# Supplementary material
Source: PubMed Central journal article supplement (PMC6856059)
Supplement: NIHMS1039905-supplement-Supplemental_information.pdf [file NIHMS1039905-supplement-Supplemental_information.pdf]

NKCC1-zebrafish  
 NKCC1-human  
 NKCC2-human  
 NCC-human  
 KKC1-human  
 KKC3-human  
 KKC2-human  
 KKC4-human

NKCC1-zebrafish  
 NKCC1-human  
 NKCC2-human  
 NCC-human  
 KKC1-human  
 KKC3-human  
 KKC2-human  
 KKC4-human

NKCC1-zebrafish  
 NKCC1-human  
 NKCC2-human  
 NCC-human  
 KKC1-human  
 KKC3-human  
 KKC2-human  
 KKC4-human

TM1a

NKCC1-zebrafish  
 NKCC1-human  
 NKCC2-human  
 NCC-human  
 KKC1-human  
 KKC3-human  
 KKC2-human  
 KKC4-human

TM1b      TM2      IL1      TM3

NKCC1-zebrafish  
 NKCC1-human  
 NKCC2-human  
 NCC-human  
 KKC1-human  
 KKC3-human  
 KKC2-human  
 KKC4-human

TM3      TM4      TM5

NKCC1-zebrafish  
 NKCC1-human  
 NKCC2-human  
 NCC-human  
 KKC1-human  
 KKC3-human  
 KKC2-human  
 KKC4-human

NKCC1-zebrafish  
 NKCC1-human  
 NKCC2-human  
 NCC-human  
 KKC1-human  
 KKC3-human  
 KKC2-human  
 KKC4-human

EL3      TM6a      TM6b

NKCC1-zebrafish  
 NKCC1-human  
 NKCC2-human  
 NCC-human  
 KKC1-human  
 KKC3-human  
 KKC2-human  
 KKC4-human

TM7      EL4

NKCC1-zebrafish  
 NKCC1-human  
 NKCC2-human  
 NCC-human  
 KKC1-human  
 KKC3-human  
 KKC2-human  
 KKC4-human

TM8      IL4      TM9

NKCC1-zebrafish  
 NKCC1-human  
 NKCC2-human  
 NCC-human  
 KKC1-human  
 KKC3-human  
 KKC2-human  
 KKC4-human



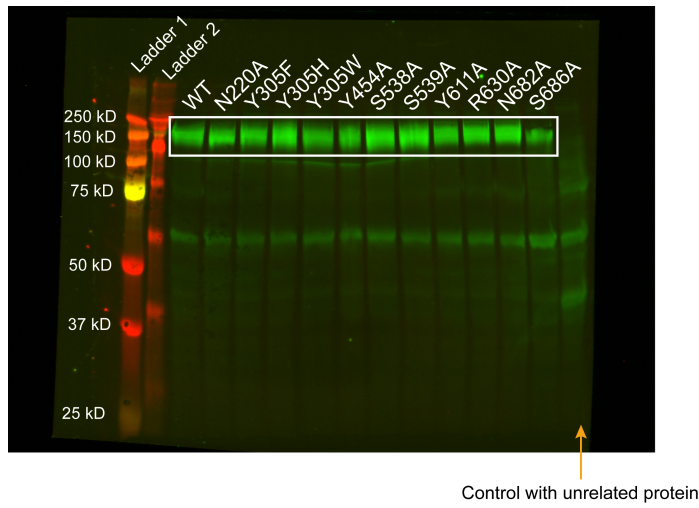

**Supplementary Figure 2 | Source image for gel electrophoresis in Extended Data Figure 6c.**

**Supplementary Table 1: Structural mapping of NCC mutations in Gitelman Syndrome**  
[1] [40]

| <b>Human NCC Mutation</b>                  | <b>Zebrafish NKCC1</b> | <b>Location</b> | <b>References</b> |
|--------------------------------------------|------------------------|-----------------|-------------------|
| <u>Ion translocation pathway mutations</u> |                        |                 |                   |
| R145C                                      | R216                   | TM1             | [65]              |
| I154F                                      | M225                   | TM1             | [66]              |
| L157P                                      | I228                   | TM1             | [67]              |
| R158Q                                      | R229                   | TM1             | [67]              |
| A226T                                      | A297                   | TM3             | [68]              |
| H234Q                                      | Y305                   | TM3             | [69]              |
| T235R                                      | V306                   | TM3             | [67]              |
| S283Y                                      | A354                   | TM5             | [70]              |
| P349L                                      | P417                   | TM6             | [71]              |
| S350L                                      | A418                   | TM6             | [65]              |
| N359K                                      | N427                   | TM6             | [72]              |
| Y386C                                      | Y454                   | TM7             | [72]              |
| G463E                                      | S534                   | TM8             | [73]              |
| A464T                                      | A535                   | TM8             | [73]              |
| K478E                                      | K549                   | TM8             | [74]              |
| <u>TM domain dimerization mutations</u>    |                        |                 |                   |
| L215P                                      | F286                   | TM3             | [68]              |
| L542P                                      | L613                   | TM10            | [74]              |
| L571P                                      | L642                   | TM11            | [75]              |
| V578M                                      | C649                   | TM11            | [76]              |
| <u>Cap mutations</u>                       |                        |                 |                   |
| A313V                                      | K383                   | TM5-TM6 loop    | [66]              |
| S314F                                      | K384                   | TM5-TM6 loop    | [77]              |
| G316V                                      | G386                   | TM5-TM6 loop    | [65]              |
| R321W                                      | D391                   | TM5-TM6 loop    | [66]              |
| R334W                                      | R404                   | TM5-TM6 loop    | [66]              |
| T339I                                      | F408                   | TM5-TM6 loop    | [66]              |
| R339C                                      | R467                   | TM7-TM8 loop    | [65]              |
| S402F                                      | T470                   | TM7-TM8 loop    | [77]              |
| N406H                                      | S474                   | TM7-TM8 loop    | [78]              |
| C421R                                      | C487                   | TM7-TM8 loop    | [71]              |
| N426K                                      | D492                   | TM7-TM8 loop    | [70]              |
| C430G                                      | C496                   | TM7-TM8 loop    | [75]              |
| G439S                                      | G510                   | TM7-TM8 loop    | [74]              |

|                                       |       |                               |      |
|---------------------------------------|-------|-------------------------------|------|
| N442S                                 | N513  | TM7-TM8 loop                  | [67] |
| <u>TM-soluble interface mutations</u> |       |                               |      |
| T194I                                 | T265  | TM2                           | [67] |
| G196V                                 | G267  | TM2-TM3 loop                  | [75] |
| R209Q                                 | R280  | TM2-TM3 loop                  | [66] |
| D486N                                 | D557  | TM8-TM9 loop                  | [71] |
| G496C                                 | G567  | TM8-TM9 loop                  | [71] |
| S555L                                 | S626  | TM10-TM11loop                 | [66] |
| P560H                                 | P631  | TM10-TM11 loop                | [67] |
| N611S                                 | N682  | linker loop                   | [65] |
| G613S                                 | G684  | linker loop                   | [68] |
| S615L                                 | S686  | linker loop                   | [66] |
| L623P                                 | Q694  | C-term $\alpha 0$ helix       | [79] |
| G630V                                 | Q701  | C-term $\alpha 0$ helix       | [71] |
| N640S                                 | T711  | $\alpha 0$ - $\beta 1$ loop   | [69] |
| R642G                                 | R713  | $\alpha 0$ - $\beta 1$ loop   | [68] |
| S833T                                 | Q941  | $\alpha 5$ - $\beta 6$ loop   | [67] |
| L858H                                 | L966  | $\alpha 6$ helix              | [76] |
| R861C                                 | N969  | $\alpha 5$ - $\beta 7$ loop   | [66] |
| T1026I                                | T1133 | C-term                        | [66] |
| <u>CTD dimerization mutations</u>     |       |                               |      |
| A728T                                 | A799  | $\alpha 3$ - $\beta 4$ loop   | [71] |
| G729V                                 | G800  | $\alpha 3$ - $\beta 4$ loop   | [66] |
| G731R                                 | G802  | $\alpha 3$ - $\beta 4$ loop   | [74] |
| <u>Structural mutations</u>           |       |                               |      |
| W172R                                 | C243  | TM2                           | [73] |
| G186D                                 | G257  | TM2                           | [74] |
| G264A                                 | G335  | TM4                           | [80] |
| T304P                                 | S375  | TM5                           | [81] |
| G374V                                 | G442  | TM7                           | [73] |
| P643L                                 | P714  | $\beta 1$ strand              | [66] |
| P735R                                 | P806  | $\alpha 3$ - $\beta 4$ loop   | [67] |
| L738R                                 | L809  | $\beta 4$ strand              | [68] |
| G741R                                 | G812  | $\beta 4$ strand              | [82] |
| P751L                                 | I822  | $\alpha 4$ helix              | [67] |
| L859P                                 | I967  | $\alpha 6$ helix              | [71] |
| L892P                                 | L1000 | $\alpha 7$ helix              | [69] |
| P947S                                 | P1055 | $\alpha 9$ - $\alpha 10$ loop | [69] |
| <u>Other TM mutations</u>             |       |                               |      |
| T163M                                 | V234  | TM1                           | [73] |

|                            |       |                             |      |
|----------------------------|-------|-----------------------------|------|
| S178L                      | A249  | TM2                         | [66] |
| T180K                      | V251  | TM2                         | [76] |
| I192T                      | I263  | TM2                         | [67] |
| D259N                      | D330  | TM4                         | [67] |
| R261H                      | R332  | TM4                         | [68] |
| K284R                      | K355  | TM5                         | [66] |
| A285G                      | A356  | TM5                         | [83] |
| A459D                      | A530  | TM8                         | [66] |
| C484W                      | C555  | TM8                         | [65] |
| A523T                      | A594  | TM9-TM10 loop               | [65] |
| N534S                      | N605  | TM10                        | [67] |
| A569E                      | A640  | TM11                        | [76] |
| A570V                      | S641  | TM11                        | [78] |
| A588V                      | A659V | TM12                        | [71] |
| <u>Other CTD mutations</u> |       |                             |      |
| T649M                      | T720  | $\beta$ 1 strand            | [69] |
| R655C                      | R726  | $\alpha$ 1 helix            | [66] |
| M672I                      | M743  | $\beta$ 2 strand            | [84] |
| V677M                      | V748  | $\beta$ 2 strand            | [73] |
| R871H                      | R979  | $\beta$ 7 strand            | [70] |
| M881T                      | I989  | $\alpha$ 7 helix            | [67] |
| R919C                      | E1027 | $\alpha$ 8 helix            | [68] |
| R928C                      | K1036 | $\alpha$ 8- $\alpha$ 9 loop | [70] |

References for the listed mutations in the table (mutations summarized in [1] [40]):

1. Gamba, G., Molecular Physiology and Pathophysiology of Electroneutral Cation-Chloride Cotransporters. *Physiol. Rev.* **85**, 423-493 (2005).
40. Dong, C., et al., Thiazide-sensitive  $\text{Na}^+$ - $\text{Cl}^-$  cotransporter: genetic polymorphisms and human diseases. *Acta. Biochim. Biophys. Sin.* **47**, 325-334 (2015).
65. Riveira-Munoz, E., et al., Transcriptional and Functional Analyses of SLC12A3 Mutations: New Clues for the Pathogenesis of Gitelman Syndrome. *J. Am. Soc. Nephrol.* **18**, 1271-1283 (2007).
66. Cruz, D.N., et al., Gitelman's syndrome revisited: An evaluation of symptoms and health-related quality of life. *Kidney. Int.* **59**, 710-717 (2001).
67. Glaudemans, B., et al., Novel NCC mutants and functional analysis in a new cohort of patients with Gitelman syndrome. *Eur. J. Hum. Genet.* **20**, 263-270 (2011).
68. Lemmink, H.H., et al., Novel mutations in the thiazide-sensitive NaCl cotransporter gene in patients with Gitelman syndrome with predominant localization to the C-terminal domain. *Kidney. Int.* **54**, 720-730 (1998).
69. Tseng, M.H., et al., Genotype, Phenotype, and Follow-Up in Taiwanese Patients with Salt-Losing Tubulopathy Associated with SLC12A3 Mutation. *J. Clin. Endocrinol. Metab.* **97**, 1478-1482 (2012).

70. Cheng, C.J., et al., Phenotype and Genotype Analysis in Chinese Patients with Gitelman's Syndrome. *J. Clin. Endocrinol. Metab.* **90**, 2500-2507 (2005).
71. Simon, D.B., et al., Gitelman's variant of Barter's syndrome, inherited hypokalaemic alkalosis, is caused by mutations in the thiazide-sensitive Na-Cl cotransporter. *Nat. Genet.* **12**, 24-30 (1996).
72. Qin, L., et al., Identification of five novel variants in the thiazide-sensitive NaCl cotransporter gene in Chinese patients with Gitelman syndrome. *Nephrology.* **14**, 52-58 (2009).
73. Syrén, M.L., et al., Identification of fifteen novel mutations in the SLC12A3 gene encoding the Na-Cl Co-transporter in Italian patients with Gitelman syndrome. *Hum. Mutat.* **20**, 78-78 (2002).
74. Mastroianni, N., et al., Novel molecular variants of the Na-Cl cotransporter gene are responsible for Gitelman syndrome. *Am. J. Hum. Genet.* **59**, 1019-1026 (1996).
75. Shao, L., et al., Novel SLC12A3 Mutations in Chinese Patients with Gitelman's Syndrome. *Nephron. Physiol.* **108**, 29-36 (2008).
76. Monkawa, T., et al., Novel Mutations in Thiazide-Sensitive Na-Cl Cotransporter Gene of Patients with Gitelman Syndrome. *J. Am. Soc. Nephrol.* **11**, 65-70 (2000).
77. Reissinger, A., et al., Novel NCCT Gene Mutations as a Cause of Gitelman's Syndrome and a Systematic Review of Mutant and Polymorphic NCCT Alleles. *Kidney. Blood. Press. Res.* **25**, 354-362 (2002).
78. Yoo, T.H., et al., Identification of novel mutations in Na-Cl cotransporter gene in a Korean patient with atypical Gitelman's syndrome. *Am. J. Kidney. Dis.* **42**, 11-16 (2003).
79. Abe, K., et al., Association of a mutation in thiazide-sensitive Na-Cl cotransporter with familial Gitelman's syndrome. *J. Clin. Endocrinol. Metab.* **81**, 4496-4499 (1996).
80. Pantanetti, P., et al., Severe hypomagnesaemia-induced hypocalcaemia in a patient with Gitelman's syndrome. *Clin. Endocrinol.* **56**, 413-418 (2002).
81. Melander, O., et al., Genetic Variants of Thiazide-Sensitive NaCl-Cotransporter in Gitelman's Syndrome and Primary Hypertension. *Hypertension.* **36**, 389-394 (2000).
82. De Jong, J.C., et al., Functional Expression of Mutations in the Human NaCl Cotransporter: Evidence for Impaired Routing Mechanisms in Gitelman's Syndrome. *J. Am. Soc. Nephrol.* **13**, 1442-1448 (2002).
83. Urbanová, M., et al., DNA Analysis of Renal Electrolyte Transporter Genes Among Patients Suffering from Bartter and Gitelman Syndromes: Summary of Mutation Screening. *Folia. Biol.* **57**, 65-73 (2011).
84. Terui, K., et al., A novel mutation of the thiazide-sensitive sodium chloride cotransporter gene in a Japanese family with Gitelman syndrome. *Clin. Nephrol.* **65**, 57-60 (2006).
